# Supplementary material for: Investigating the Relationship between Glaucoma Prevalence and Trabecular Meshwork Length
Source: MDPI journal article supplement (doi:10.3390/jcm10051096), 2021-03-05
Supplement: s1 [file s1]

**Supplementary Table S1.** Baseline clinical characteristics of open and closed angle groups

| Characteristic              | Mean $\pm$ SD or <i>n</i> (%) |                    |
|-----------------------------|-------------------------------|--------------------|
|                             | Open                          | closed             |
| Age (years)                 | 50.00 $\pm$ 16.16             | 64.10 $\pm$ 9.64   |
| Sex (no. of eyes)           |                               |                    |
| Male                        | 99 (51.03%)                   | 16 (31.37%)        |
| Female                      | 95 (48.97%)                   | 35 (68.63%)        |
| IOP (mmHg)                  | 13.50 $\pm$ 3.21              | 15.51 $\pm$ 5.90   |
| Spherical equivalent (D)    | -2.71 $\pm$ 3.51              | 1.54 $\pm$ 3.91    |
| Anterior chamber depth (mm) | 3.02 $\pm$ 0.33               | 1.89 $\pm$ 0.34    |
| CCT ( $\mu$ m)              | 539.15 $\pm$ 2.55             | 543.92 $\pm$ 34.03 |

IOP = intraocular pressure; SD = standard deviation; CCT = central corneal thickness
